# Supplementary material for: RP11-619L19.2 promotes colon cancer development by regulating the miR-1271-5p/CD164 axis
Source: PubMed Central journal article supplement — Oncol Rep. 2020 Oct 7;44(6):2419–28. doi: 10.3892/or.2020.7794 (PMC7610312; doi:10.3892/or.2020.7794), 2020-10-07

Figure S1. The transfection efficiency was verified by qPCR analysis. (A) HCT116 or SW620 cells were transfected with shRNAs targeting RP11-619L19.2 or scramble control sh-NC. The relative expression of RP11-619L19.2 was evaluated by qPCR analysis 48 h later. (B) HCT116 or SW620 cells were transfected with miR-1271-5p mimic or negative control miR-NC. The relative expression of miR-1271-5p was evaluated by qPCR analysis 48 h later. (C) HCT116 or SW620 cells were transfected with miR-1271-5p inhibitor or negative control miR-NC. The relative expression of miR-1271-5p was evaluated by qPCR analysis 48 h later. (D) HCT116 or SW620 cells were transfected with pcDNA3.1 empty vector or pcDNA3.1-CD164. The relative expression of CD164 was evaluated by qPCR analysis 48 h later. \* $P < 0.05$ , \*\* $P < 0.01$ . qPCR, quantitative PCR.

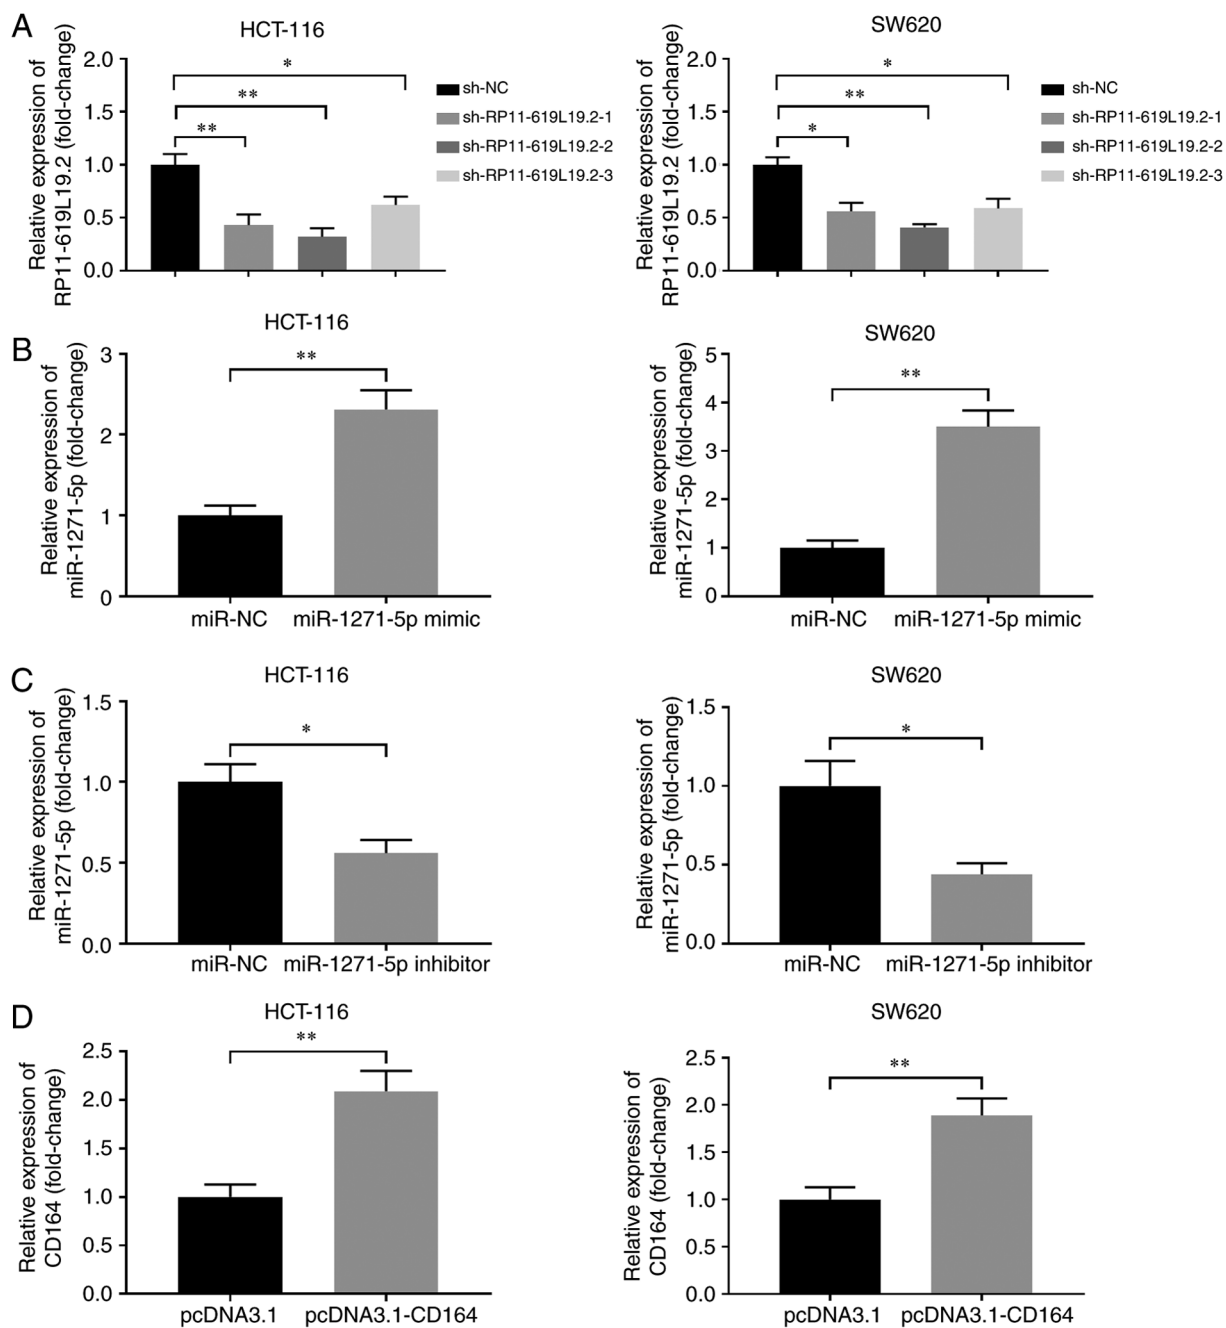

Figure S2. The functional effect of RP11-619L19.2/miR-1271-5p/CD164 on cell proliferation was evaluated by CCK-8 assay. (A and B) HCT-116 or SW620 cells were transfected with sh-NC or sh-RP11-619L19.2. The cell proliferation was analyzed by CCK-8 assay at indicated time points. (C and D) HCT-116 or SW620 cells were transfected with miR-NC or miR-1271-5p mimics. The cell proliferation was analyzed by CCK-8 assay at indicated time points. (E and F) HCT-116 or SW620 cells were transfected with sh-NC, sh-RP11-619L19.2, or sh-RP11-619L19.2 + pcDNA3.1-CD164. The cell proliferation was analyzed by CCK-8 assay at indicated time points. \* $P < 0.05$ . CCK-8, Cell Counting Kit-8.

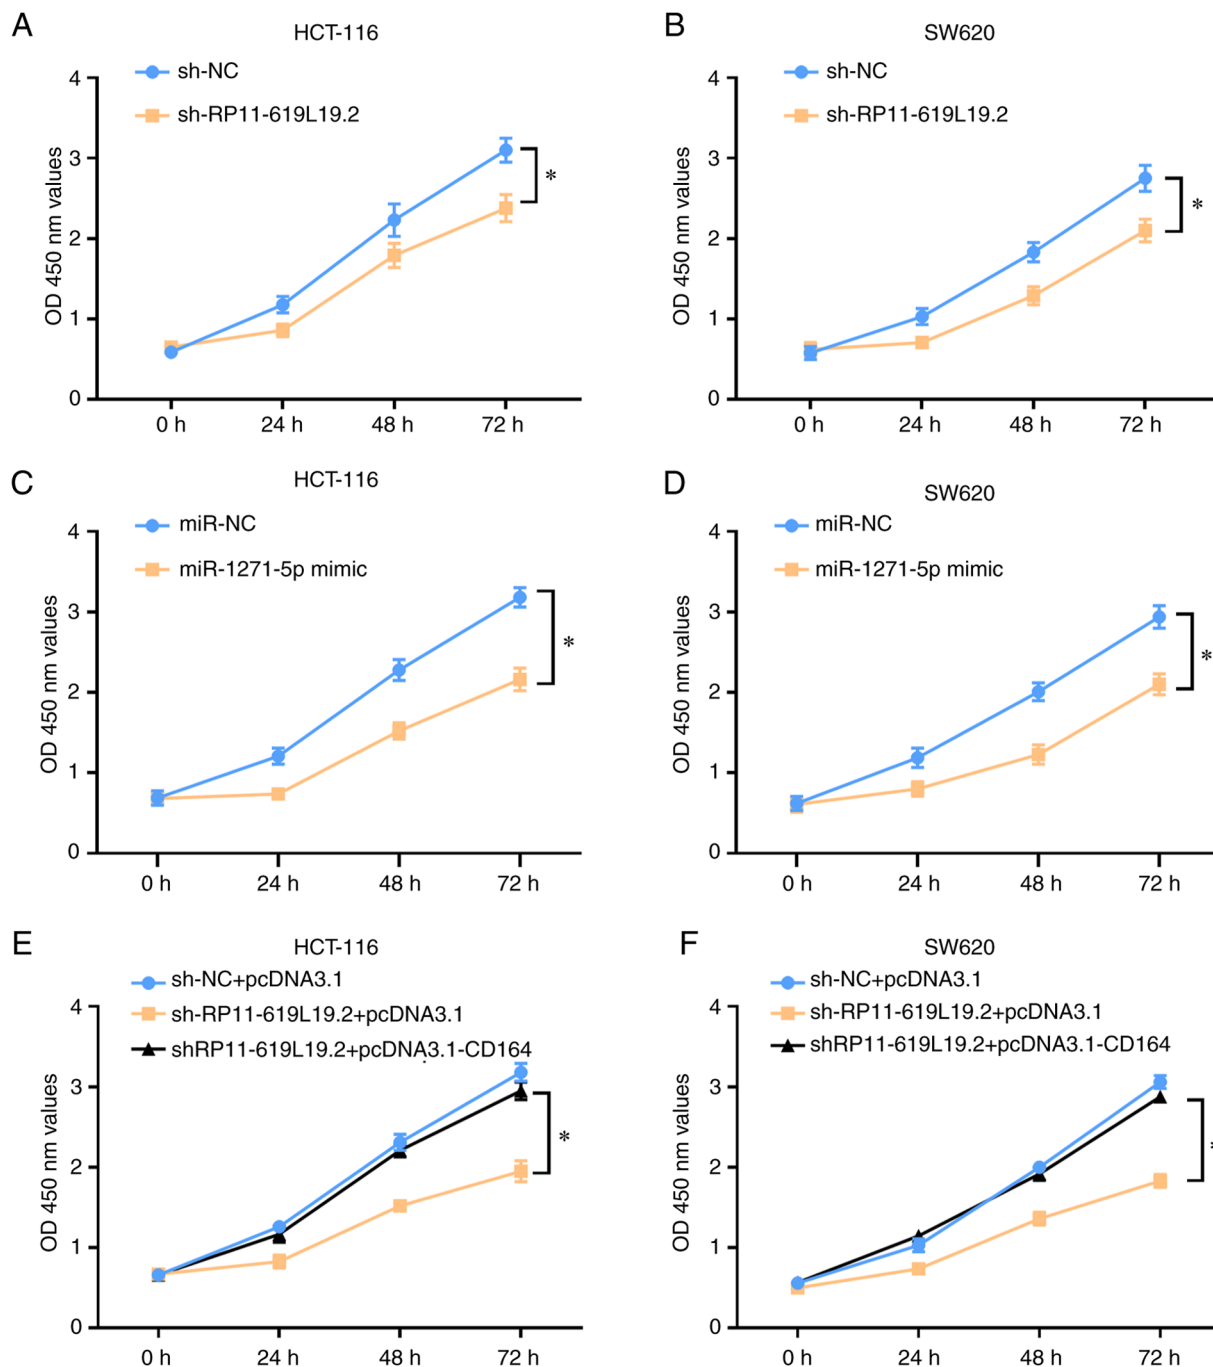

Supplement: Supplementary_Data.pdf [file Supplementary_Data.pdf]
